# Supplementary material for: Matrix Metalloproteinase-9 (MMP-9) polymorphisms in patients with cutaneous malignant melanoma
Source: PubMed Central journal article supplement (PMC1831467; doi:10.1186/1471-2350-8-10), 2007-03-08
Supplement: 1471-2350-8-10-S1.pdf [file 1471-2350-8-10-S1.pdf]

**Supplementary Table 1:** Oligonucleotides and PCR conditions

| Method | Marker                       | PCR primers                       |                                   | LT probes /PSQ primers (5' à 3')        | Ta (°C) <sup>§</sup> | PCR additives |
|--------|------------------------------|-----------------------------------|-----------------------------------|-----------------------------------------|----------------------|---------------|
|        |                              | Forward (5' → 3')                 | Reverse (5' → 3')                 |                                         |                      |               |
| PSQ    | (-)1562 (400bp)              | GCACATAGTAGGCCCTTTA               | TCTATATTCACCTTCTTCAAAGC           |                                         | 56                   |               |
|        | (-)1562 (151bp) <sup>‡</sup> | <i>Biot</i> - GGCAGATCACTTGAGTC   | GGTTCAAGCAATTCTCCT                | CCGAGTAGCTGGTATTATAG                    | 59-0.2 / 57          |               |
|        | Exon 6 c279                  | CTTCTCCCCCTTTCCACATC              | <i>Biot</i> - TGGCAGGGTTTCCCATCAG | CCCCAGGACTCTACAC                        | 64                   |               |
|        | Exon 12 c668                 | <i>Biot</i> - TGGACACGCACGACGTCTT | GCTTTTTCTTCCTCGCTCAGAAT           | CCTCAGCCCTCACCT                         | 58                   |               |
| LT     | Exon 3 c127                  | GCTCCAGCCTTTCACCTTCT              | CTCCTCACGTTCTCACCC                | AGGATCCAAAACACTACTCGGAA- <i>SPC-Flo</i> | 54                   | Betaine 1M    |
|        | Exon 3 c165                  | GCTCCAGCCTTTCACCTTCT              | CTCCTCACGTTCTCACCC                | GGACGCAAACATCGTCATCCAGT- <i>SPC-Flo</i> | 54                   | Betaine 1M    |
| FA     | (-)131 (CA) <sub>n</sub>     | <i>Flo</i> - ACTTGGCAGTGGAGACTGC  | TGTTGTGGGGCTTTAAGGAG              |                                         | 58-0.5 / 55          |               |
| HET    | Exon 10 c574                 | GTTCAAGGATGGGTGAGGAG              | CAGGGGGCGTATTTTTCTAA              |                                         | 55                   |               |

**Abbreviations:** SEQ, sequencing; PSQ, pyrosequencing; LT, LightTyper; FA, fragment size analysis; HET, heteroduplex analysis by DHPLC; Biot, biotin; Flo, fluorescein; SPC, Simple Probe Chemistry; Ta, annealing temperature

<sup>‡</sup>The 151bp fragment is product of a nested PCR (see methods)

<sup>§</sup>touch-down PCRs are expressed as: initial Ta - °C per cycle / final Ta
